# Supplementary material
Source: MDPI journal article supplement (https://www.mdpi.com/2312-7481/9/9/207)
Supplement: s1 [file s1]

Archive with 5 entries (5 files):
- Supplemetary.pdf
- Video S1.mp4
- Video S2.mp4
- Video S3.mp4
- Video S4.mp4
